# Supplementary material for: Knocking out alpha-synuclein in melanoma cells dysregulates cellular iron metabolism and suppresses tumor growth
Source: PubMed Central journal article supplement (PMC7933179; doi:10.1038/s41598-021-84443-y), 2021-03-04
Supplement: 41598_2021_84443_MOESM1_ESM.pdf [file 41598_2021_84443_MOESM1_ESM.pdf]

## Supplementary information

### Knocking out alpha-synuclein in melanoma cells dysregulates cellular iron metabolism and suppresses tumor growth

Sahar Shekoohi<sup>1</sup>, Santhanasabapathy Rajasekaran<sup>1</sup>, Dhaval Patel<sup>1</sup>, Shu Yang<sup>1</sup>,  
Wang Liu<sup>1</sup>, Shile Huang<sup>1</sup>, Xiuping Yu<sup>1</sup> and Stephan N. Witt<sup>1,\*</sup>

<sup>1</sup>Department of Biochemistry and Molecular Biology, Louisiana State University Health Sciences Center, Shreveport, LA 71103.

\*To whom correspondence should be addressed: Tel: 318-675-5163; Fax: 318-675-5180; E-mail: [switt1@lsuhsc.edu](mailto:switt1@lsuhsc.edu)

Figure S1

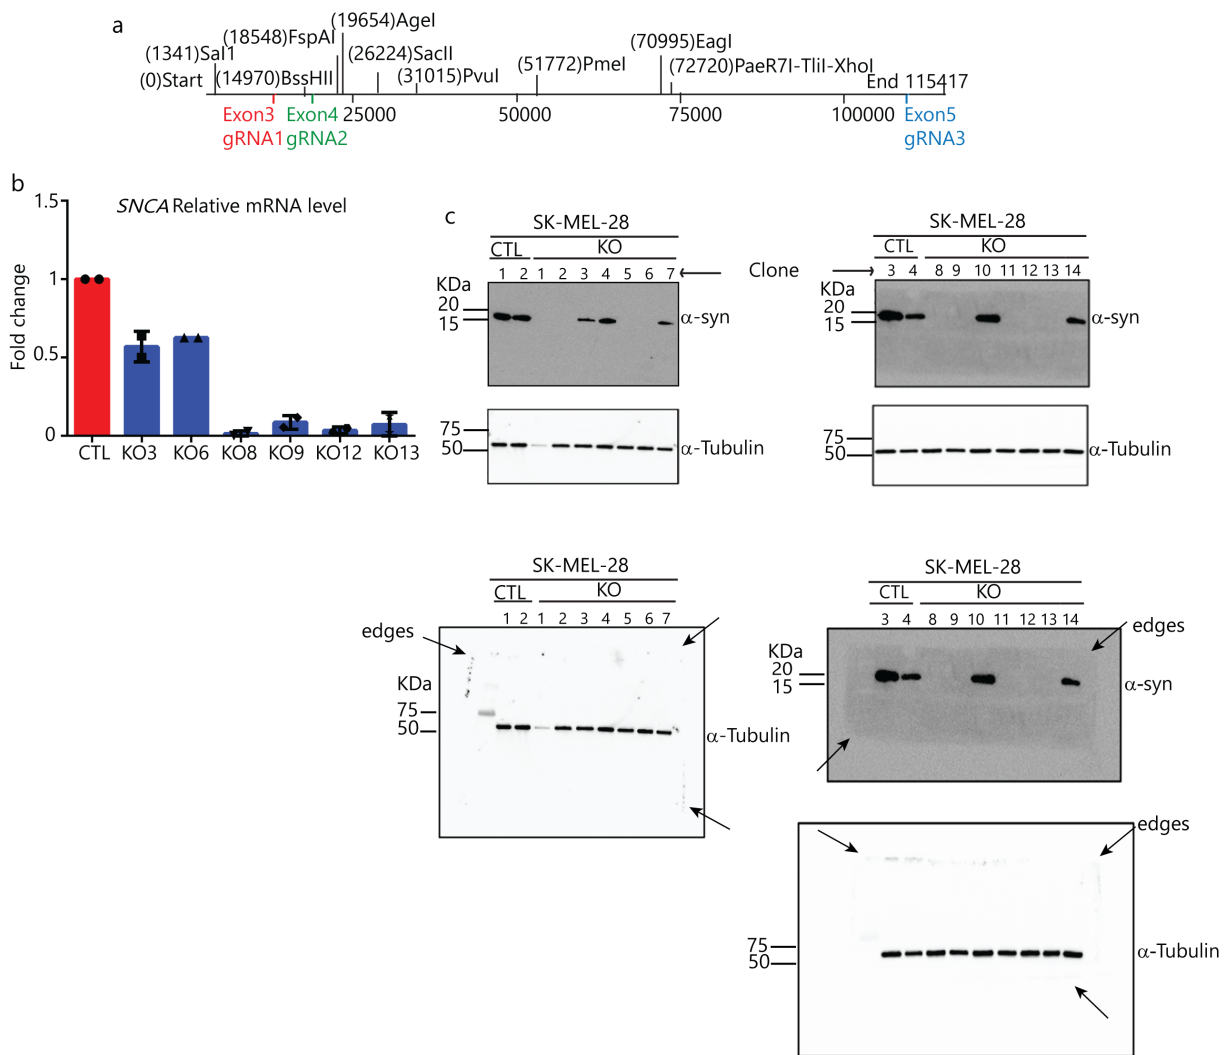**Supplementary Figure S1.**

CRISP-Cas9-mediated KO of *SNCA* in SK-Mel-28 melanoma cells. **(a)** Human *SNCA* DNA sequence. gRNA 1, 2 and 3 are complementary to exon 3, 4 and 5, respectively. **(b)** Quantitative data showing RT-qPCR analysis of  $\alpha$ -syn transcript level (n=2) in KO cells normalized to control cells and  $\beta$ -actin by  $\Delta\Delta Ct$  method. **(c)** Western blot analysis of *SNCA* in KO clones (n=3). Cell

lysates were subjected to SDS PAGE followed by western blotting for the indicated proteins.  $\alpha$ -Tubulin was used as loading control.

Figure S2

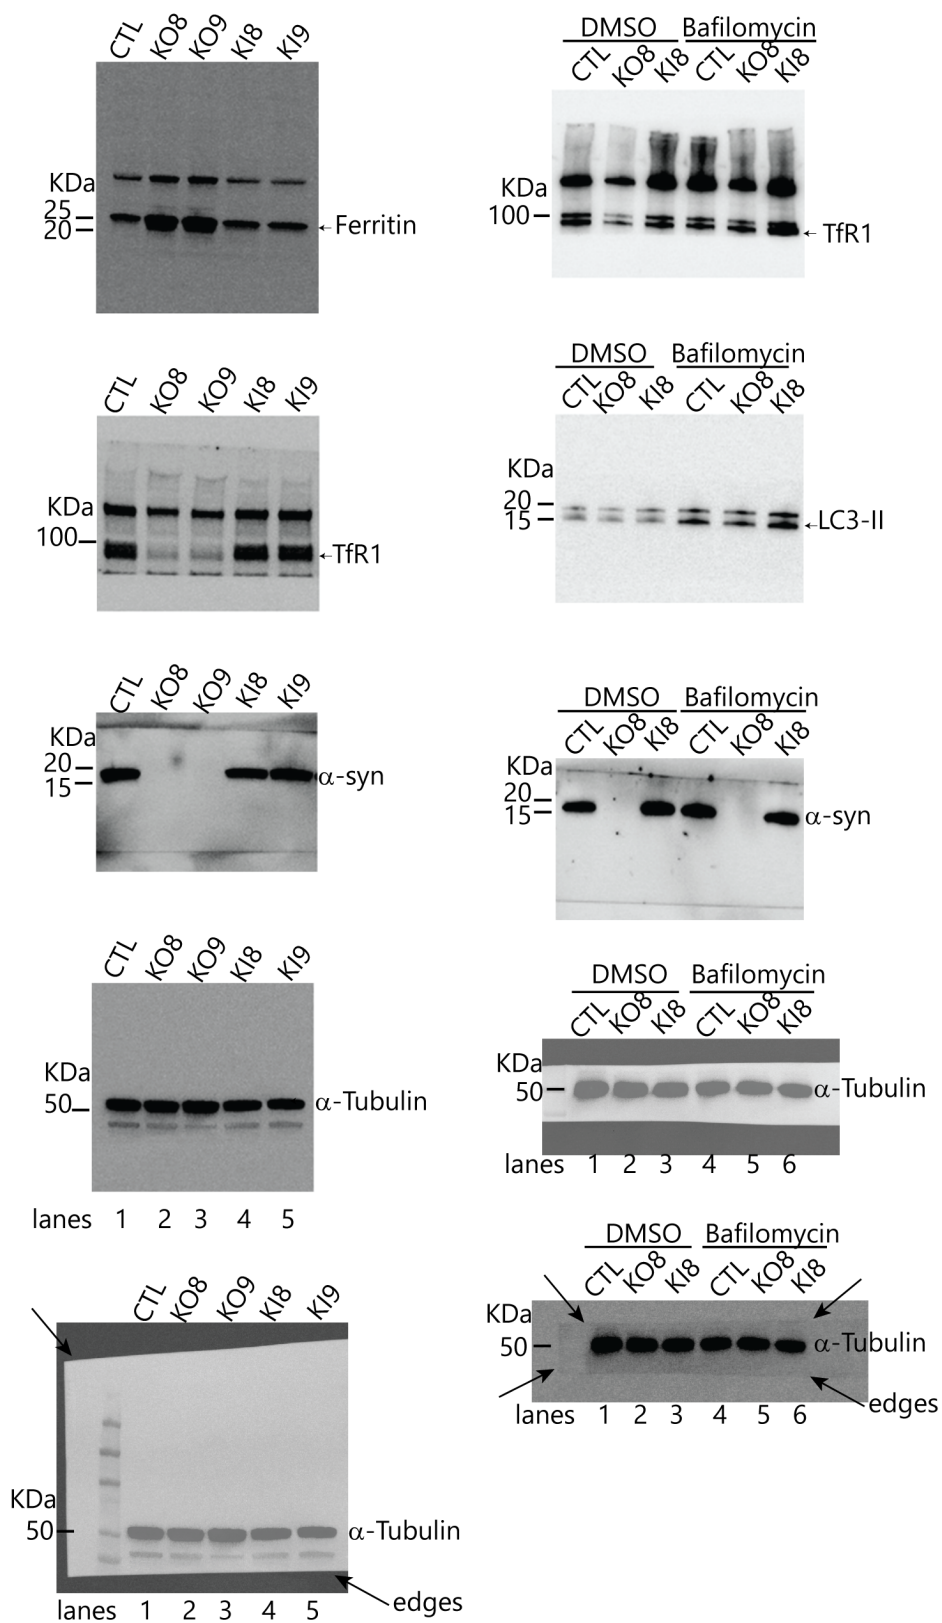

Figure S2 continued

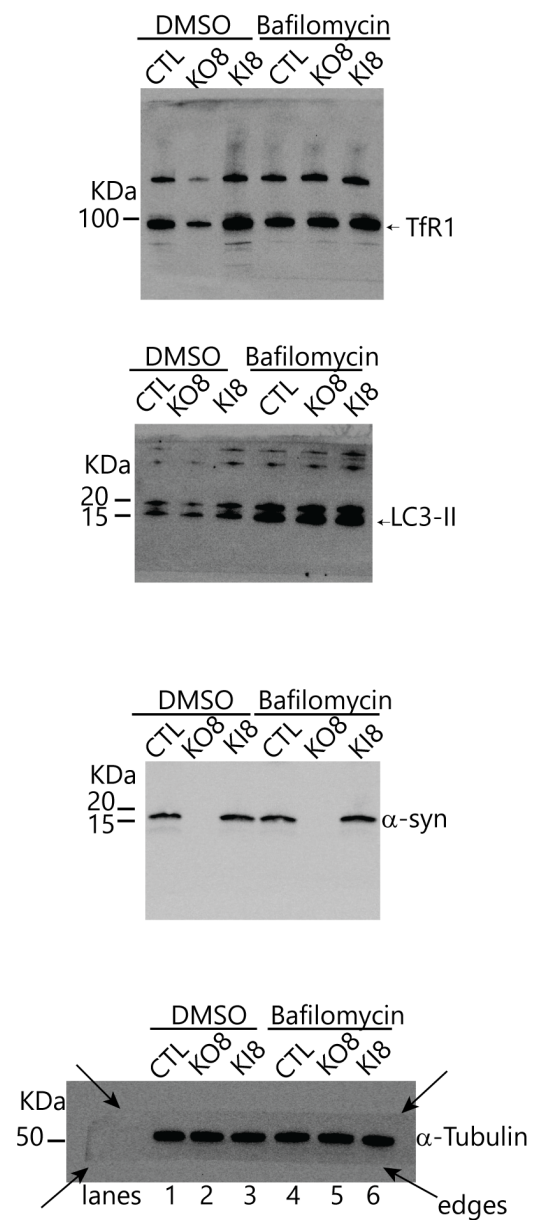**Supplementary Figure S2.**

Full length original uncontrasted Western blots which are shown cropped in Figure 2 a, d.

Figure S3

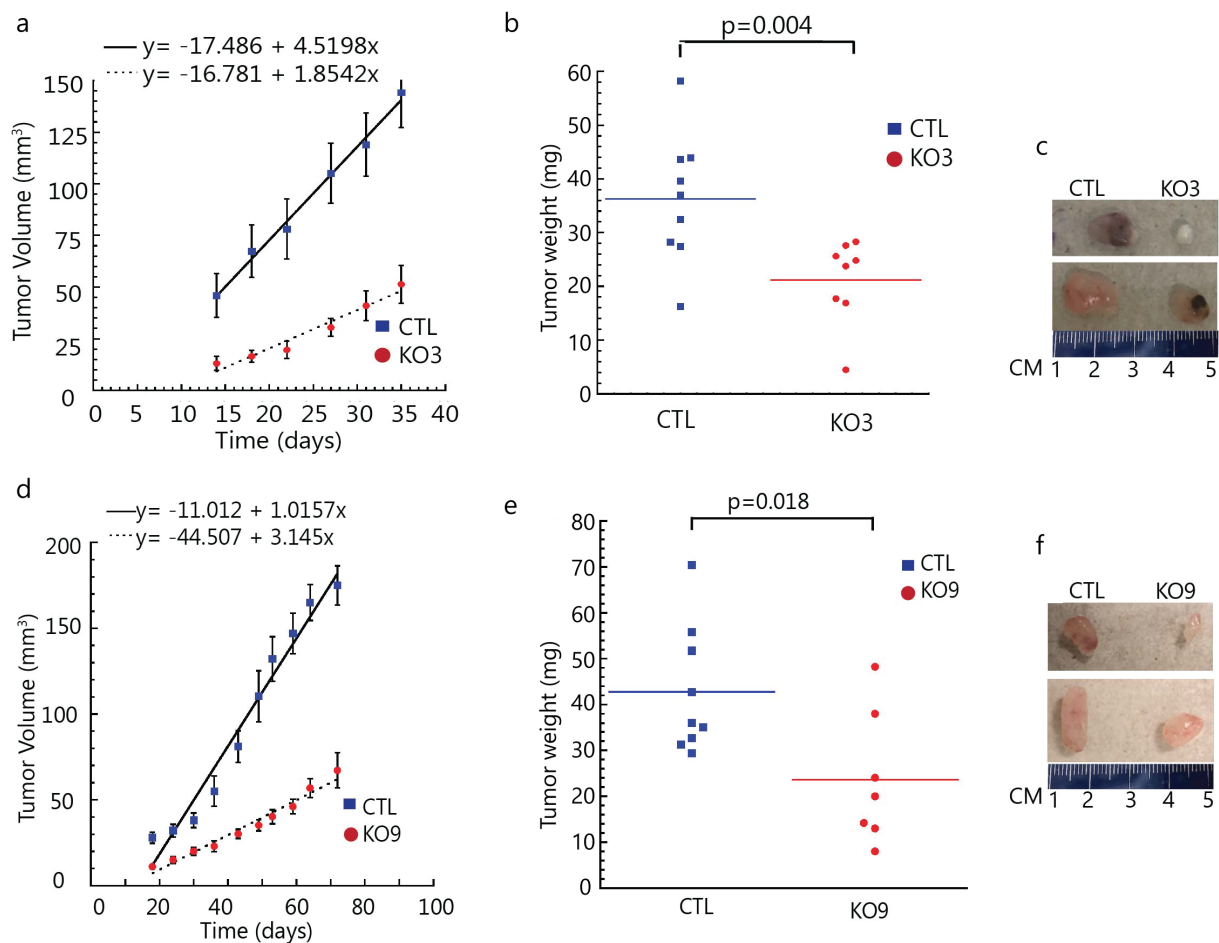

### Supplementary Figure S3.

Loss of  $\alpha$ -syn expression suppresses cell growth in a mouse xenograft model. **(a)** and **(d)** Tumor volume over time for the control, KO3 and KO9 xenografts. Tumor volume was assessed every 2 days, and average tumor weight was determined after the mice were sacrificed at the end of 72-day experiment. **(b)** and **(e)** Weight of the excised tumors are shown. **(c)** and **(f)** Representative photographs of xenograft mice tumors. Tumor volume and weight were analyzed using two-tailed Student's t test ( $n = 7-9$  mice).

Figure S4

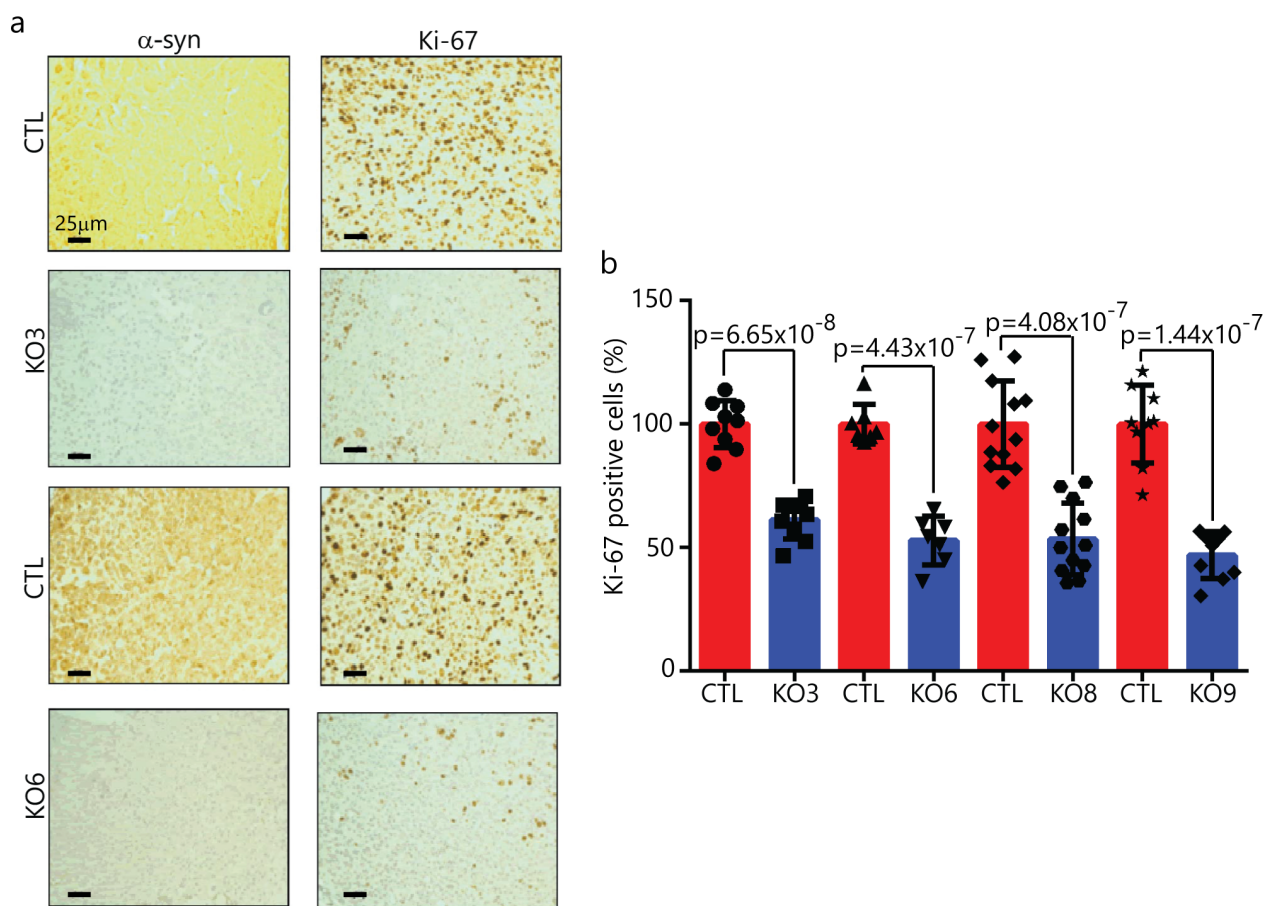**Supplementary Figure S4.**

$\alpha$ -syn and Ki67 staining of tumor tissue from SK-Mel-28 xenografts. **(a)** Representative images of immunostained sections of xenografts generated from subcutaneous injection of the *SNCA* KO clone 3, 6 and control cells into mice. Tumor sections were probed with antibodies specific for  $\alpha$ -syn and Ki-67. Magnification 20 $\times$ , scale bar = 25  $\mu$ m. **(b)** Plot of the number of Ki-67 immunopositive cells per 20x field. For each condition, n = 3 (KO3, 6), with 1-3 fields counted for each slide. The two tailed student's t test was performed to calculate p values. Error bars are  $\pm$  s.d.

This is the same plot as in Figure 6.

Figure S5

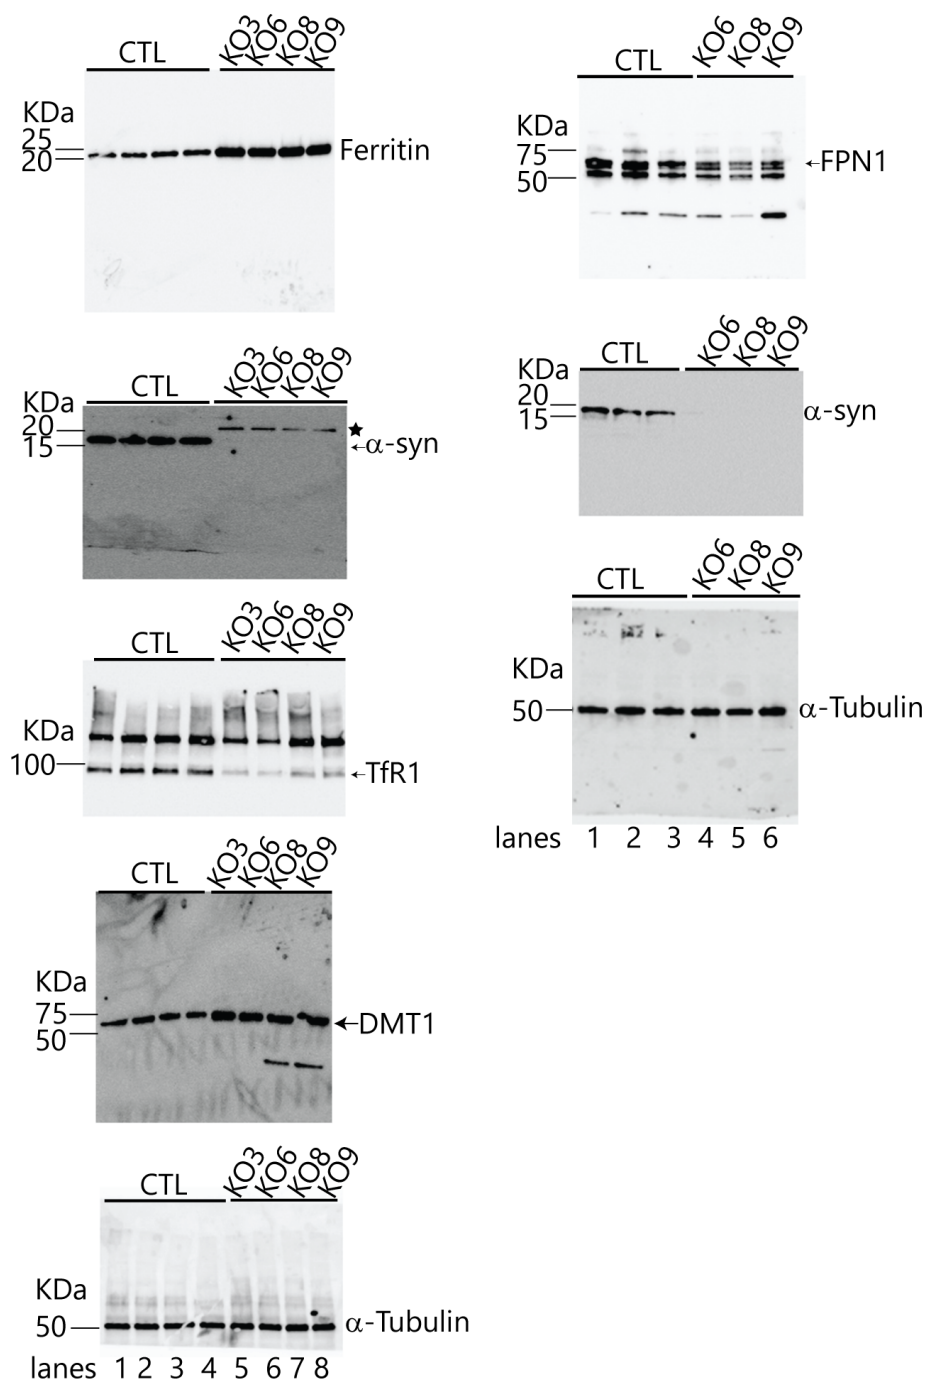**Supplementary Figure S5.**

Full length original uncontrasted Western blots which are shown cropped in Figure 7 a, e. \*, denotes residual ferritin.



Table S1. SK-Mel-28 *SNCA* KO clones

| <b>Crispr KO clones #</b> | <b>WB of <math>\alpha</math>-syn protein</b> | <b>RT-qPCR of <math>\alpha</math>-syn mRNA</b> | <b>DNA sequencing of <i>SNCA</i></b> | <b>validation</b>                                     |
|---------------------------|----------------------------------------------|------------------------------------------------|--------------------------------------|-------------------------------------------------------|
| Control                   | yes                                          | yes                                            | All exons                            | Full expression                                       |
| 3                         | partial                                      | partial                                        | No exon 4                            | Monoallelic deletion clone<br>(heterozygous deletion) |
| 6                         | no                                           | partial                                        | No exon 3; no exon 4                 | Biallelic deletion clone<br>(homozygous deletion)     |
| 8                         | no                                           | no                                             | No exon 3; no exon 4                 | Biallelic deletion clone<br>(homozygous deletion)     |
| 9                         | no                                           | no                                             | No exon 3; no exon 4                 | Biallelic deletion clone<br>(homozygous deletion)     |

Table S2 Antibodies

| <b>Name</b>                 | <b>Antibody type</b> | <b>Application</b> | <b>Dilution</b>  | <b>Catalog Number and Company</b>  |
|-----------------------------|----------------------|--------------------|------------------|------------------------------------|
| $\alpha$ -synuclein         | Monoclonal (mouse)   | Western Blot / IHC | 1:1000/<br>1:500 | 610786, BD Biosciences             |
| Transferrin Receptor        | Monoclonal (mouse)   | Western Blot       | 1:1000           | 13-6800, Thermo Fisher Scientific  |
| Ferroportin                 | Polyclonal (rabbit)  | Western Blot       | 1:1000           | PA522993, Thermo Fisher Scientific |
| LC3-II                      | Polyclonal (rabbit)  | Western Blot       | 1:1000           | 2775S, Cell Signaling Technology   |
| $\alpha$ -Tubulin           | Monoclonal (mouse)   | Western Blot       | 1:1000           | T9026, Santa Cruz                  |
| HRP- conjugated anti-rabbit | rabbit               | Western Blot       | 1:1000           | sc-516102, Santa Cruz              |
| HRP- conjugated anti-mouse  | mouse                | Western Blot       | 1:1000           | sc-2357, Santa Cruz                |
| DMT1                        | Monoclonal (mouse)   | Western Blot       | 1:1000           | sc-166884, Santa Cruz              |
| Ferritin                    | Monoclonal (mouse)   | Western Blot       | 1:1000           | sc-74513, Santa Cruz               |
| Ki-67                       | Monoclonal (rabbit)  | Western Blot / IHC | 1:1000/<br>1:500 | 12202S, Cell Signaling Technology  |
